# Supplementary material
Source: MDPI journal article supplement (https://www.mdpi.com/2673-6500/3/1/11)

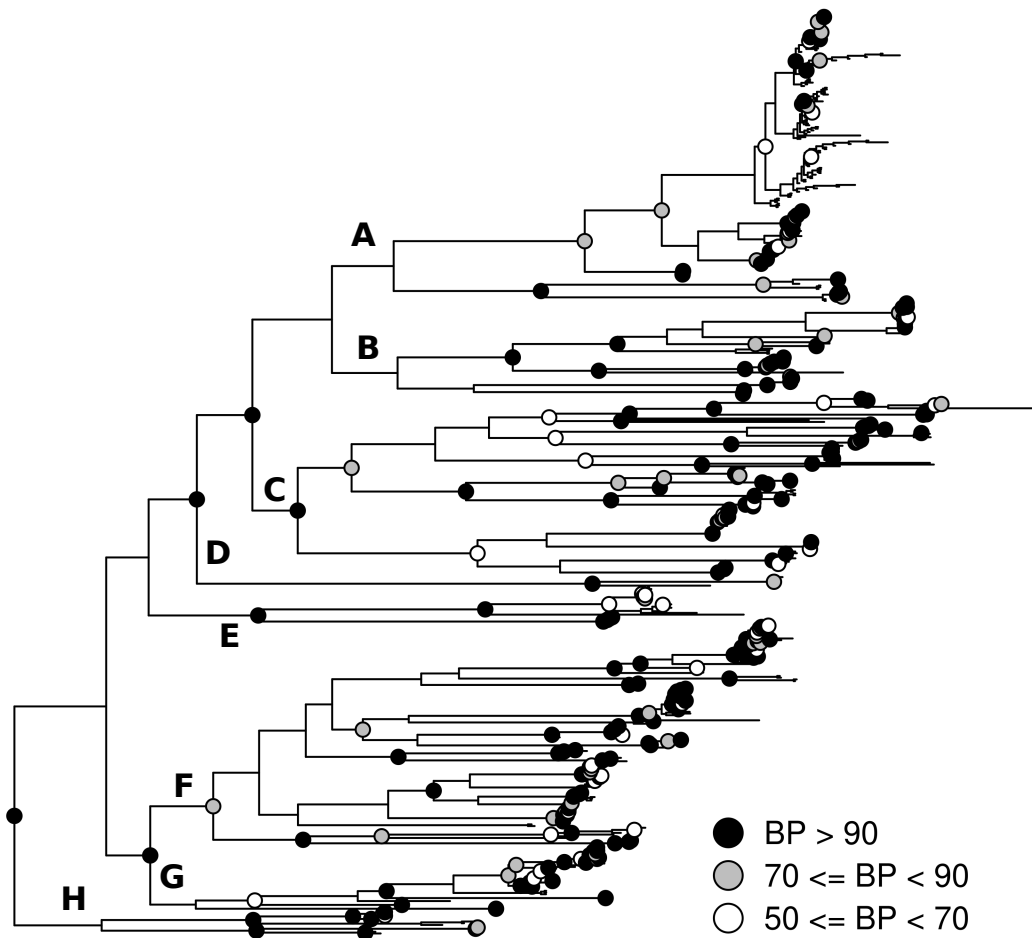

Supplement: s1 [file s1]
